# Supplementary material for: Production of reactive oxygen and nitrogen species by light irradiation of a nitrosyl phthalocyanine ruthenium complex as a strategy for cancer treatment
Source: Royal Society of Chemistry journal article supplement (doi:10.1039/c3dt52217b), 2013-12-18
Supplement: c3dt52217b.pdf [file c3dt52217b.pdf]

## SUPPLEMENTARY MATERIAL

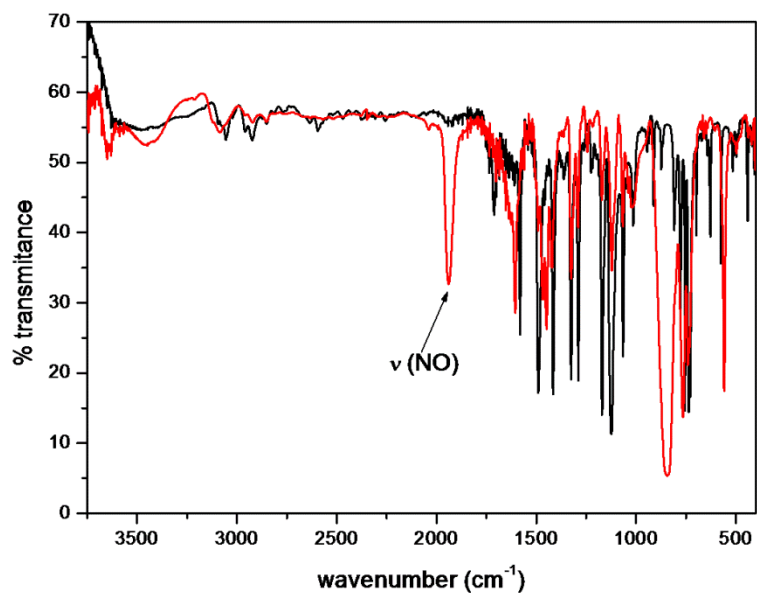

Figure 1: FTIR spectrum of [Ru(pc)(pz)<sub>2</sub>] (black line) and [Ru(pc)(pz)<sub>2</sub>{Ru(bpy)<sub>2</sub>(NO)}<sub>2</sub>](PF<sub>6</sub>)<sub>6</sub> (red line) in KBr pellet.
